# Supplementary material for: Evidence of a new phase in gypsum–anhydrite transformations under microwave heating byin situdielectric analysis and Raman spectroscopy
Source: Royal Society of Chemistry journal article supplement (doi:10.1039/d0cp04926c), 2020-01-01
Supplement: d0cp04926c1.pdf [file d0cp04926c1.pdf]

## Supporting Information

### Evidences of a New Phase in Gypsum-Anhydrite Transformations Under Microwave Heating by In Situ Dielectric Analysis and Raman Spectroscopy

Angel M. López-Buendía\*, Beatriz García-Baños\*, M. Mar Urquiola, José M. Catalá-Civera, Felipe L. Peñaranda-Foix

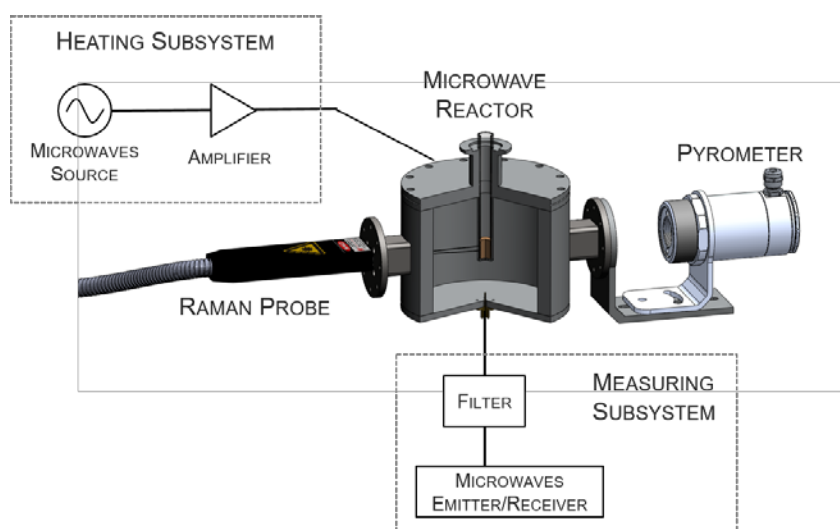

**Figure S1.** Schematic view of the microwave system employed to heat and measure the dielectric properties of gypsum samples as a function of temperature.

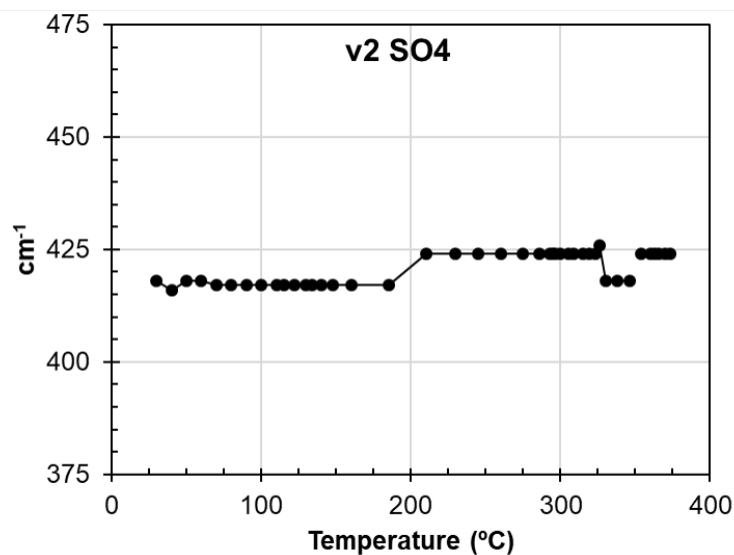

**Figure S2.** Results from in situ Raman measurements for the  $\nu_2$   $\text{SO}_4$  vibration mode as a function of temperature.

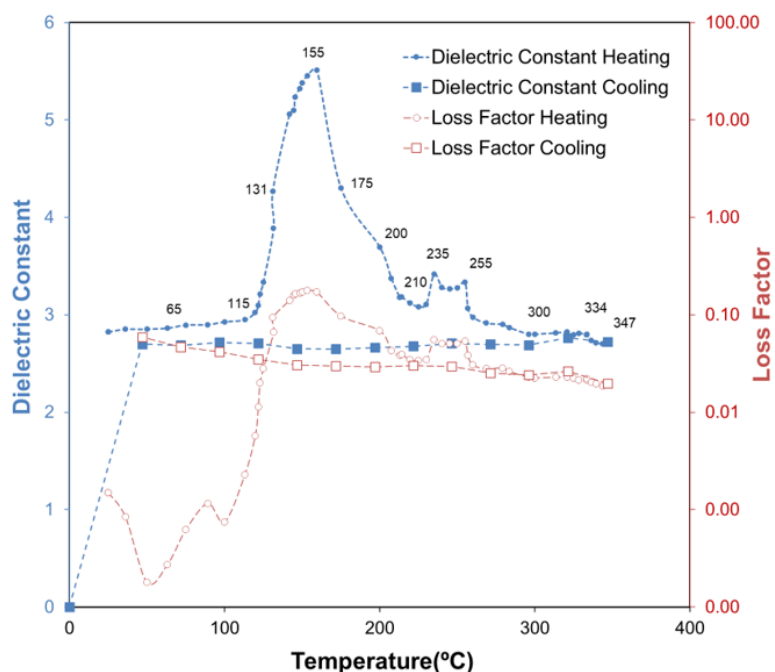

**Figure S3.** Measured dielectric constant and loss factor variations of gypsum sample as a function of temperature, both for the microwave heating and cooling cycles.

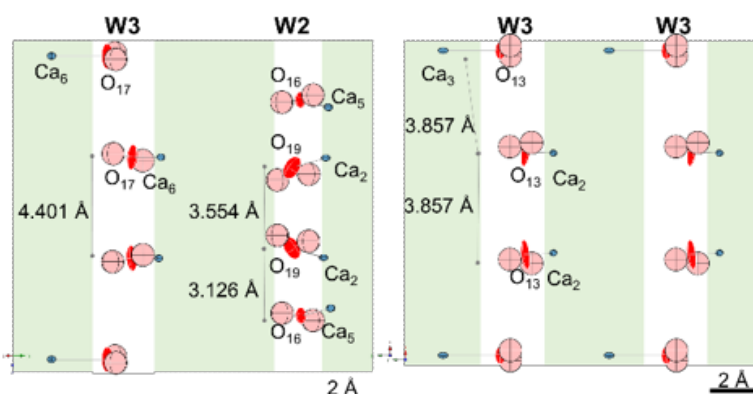

**Figure S4.** Water channels in  $\text{CaSO}_4 \cdot 0.625\text{H}_2\text{O}$  along a axis and  $\text{CaSO}_4 \cdot 0.5\text{H}_2\text{O}$  (perpendicular to (010)). Example of a water molecule (H1-O19-H2) placed in a 2W water channel of 0.625-hemihydrate, at room temperature. Translational movement (H1-O19-H2) rotate fixed Ca2 of the O16-Ca2 bond in 2W, and rotational along the O16-Ca2 bond axis.
